# Supplementary material for: Effect of Zinc Source and Exogenous Enzymes Supplementation on Zinc Status in Dogs Fed High Phytate Diets
Source: PubMed Central journal article supplement (PMC7142709; doi:10.3390/ani10030400), 2020-02-29
Supplement: animals-10-00400-s001.pdf [file animals-10-00400-s001.pdf]

**Table S1.** Certified and measured values of certified reference materials BCR®-679, ERM®-DB001 and oat flour powder

| Element<br>Units/kg | BCR®-679               |                   | ERM®-DB001         |                   | Oat Flour Powder <sup>c</sup> |                   |
|---------------------|------------------------|-------------------|--------------------|-------------------|-------------------------------|-------------------|
|                     | Certified<br>Value     | Measured<br>Value | Certified<br>Value | Measured<br>Value | Certified<br>Value            | Measured<br>Value |
| Ca, g               | 7.8 ± 0.7 <sup>1</sup> | 7.53              | ---b               | ---b              | ---b                          | ---b              |
| P, g                | 3.3 ± 0.2 <sup>1</sup> | ---b              | ---b               | ---b              | 4.35                          | 4.40 ± 0.1        |
| Mg, g               | 1.4 ± 0.1 <sup>1</sup> | 1.34              | ---b               | ---b              | ---b                          | ---b              |
| K, g                | ---b                   | ---b              | ---b               | ---b              | ---b                          | ---b              |
| Fe, mg              | 55.0 ± 2.5             | ---b              | ---b               | ---b              | ---b                          | ---b              |
| Zn, mg              | 79.7 ± 2.7             | 76.7 ± 2.44       | 209 ± 12           | 201 ± 5.7         | ---b                          | ---b              |
| Mn, mg              | 13.3 ± 0.5             | 14.0 ± 0.34       | ---b               | ---b              | ---b                          | ---b              |
| Cu, mg              | 2.89 ± 0.12            | 2.92 ± 0.02       | 33 ± 4             | ---b              | ---b                          | ---b              |

<sup>b</sup> Not available or not quantified; <sup>1</sup> – Indicative values; <sup>c</sup> – supplied with Phytic Acid Assay Kit (Megazyme),

**Table S2.** Analytical uncertainty with 95 % confidence interval provided and measured values (ppb) of certified reference materials Seronorm™ Urine and Seronorm™ Serum

| Element<br>ppb | Level | Seronorm™ Urine           |                   | Seronorm™ Serum           |                   |
|----------------|-------|---------------------------|-------------------|---------------------------|-------------------|
|                |       | Analytical<br>Uncertainty | Measured<br>Value | Analytical<br>Uncertainty | Measured<br>Value |
| Fe             | 1     | ---b                      | ---b              | 1170 - 1770               | 1561              |
|                | 2     | ---b                      | ---b              | 1720 - 2580               | 2371              |
| Zn             | 1     | 277 - 417                 | 217               | 952 - 1242                | 805               |
|                | 2     | 1023 - 1538               | 1257              | 1404 - 1831               | 1543              |
| Mn             | 1     | 1.10 – 1.66               | 1.52              | 7.9 – 11.9                | 8.07              |
|                | 2     | 7.4 – 11.2                | 10.3              | 11.6 – 17.4               | 13.3              |
| Cu             | 1     | 16 - 24                   | 24.9              | 999 - 1281                | 1110              |
|                | 2     | 44.9 - 67.6               | 57.6              | 1700 - 2000               | 1978              |

<sup>b</sup> Not available or not quantified

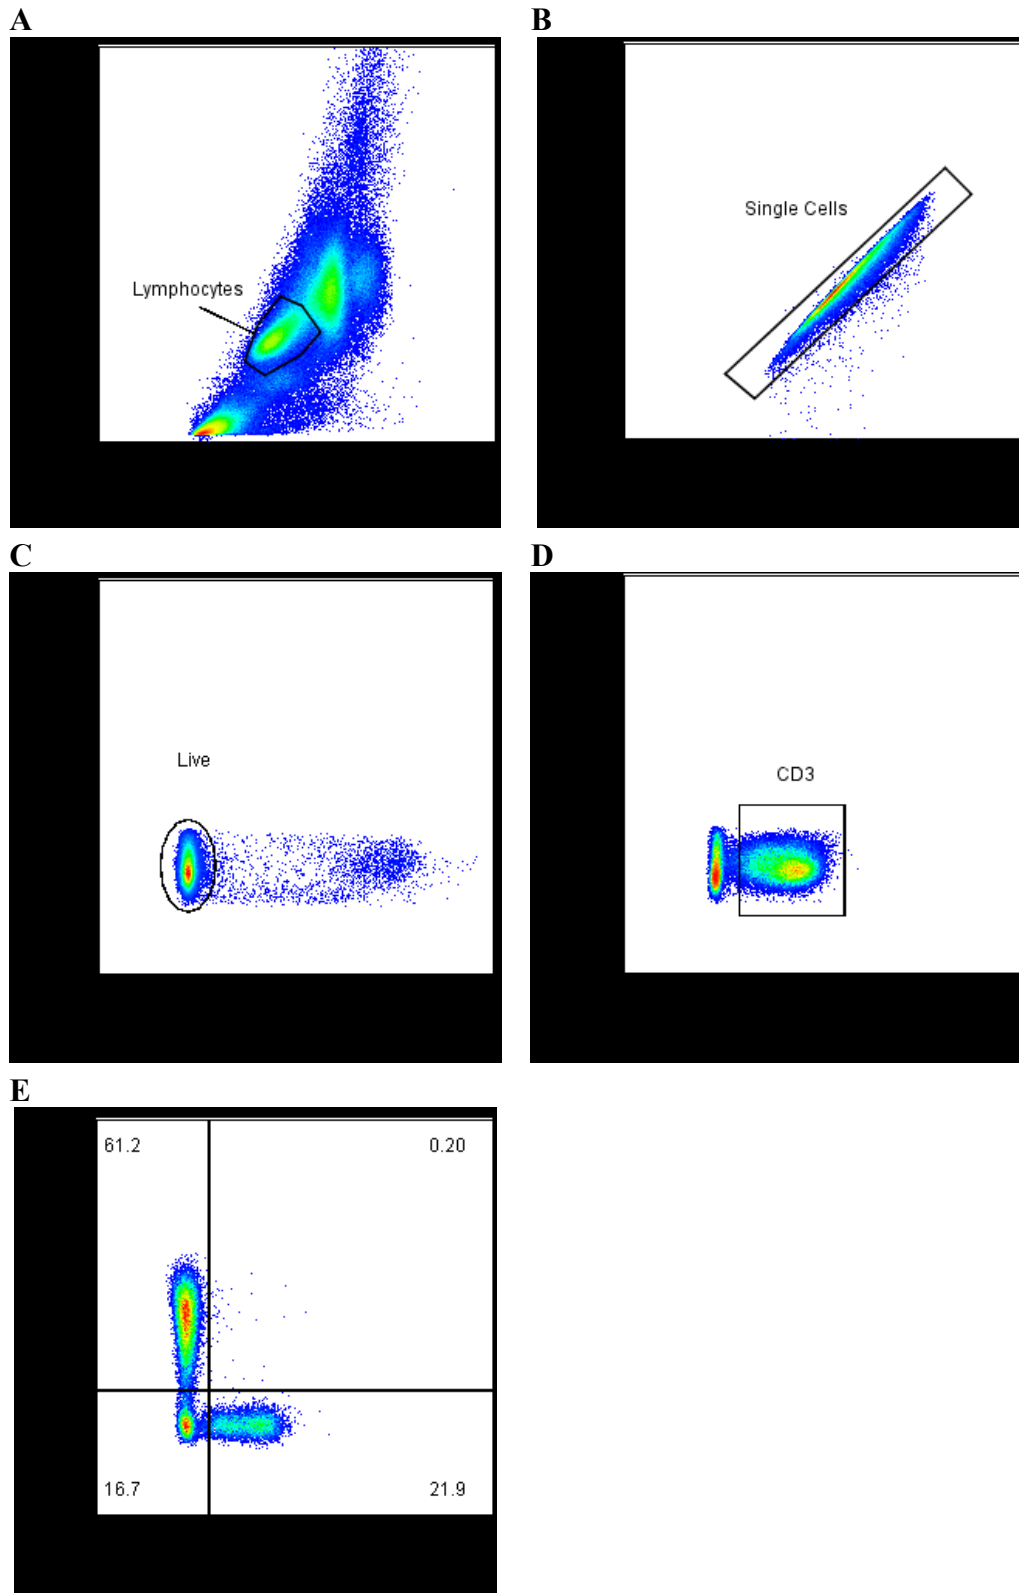

**Figure S1.** Representative example of the gating strategy followed to obtain CD4<sup>+</sup> and CD8<sup>+</sup> T cell subsets. Lymphocytes (A) were selected based on FSC and SSC parameters, as cells presenting small size and low granularity; single cells (B) were defined by plotting FSC-A vs FSC-H ; and live cells (C) were selected among cells that did not incorporate propidium iodide; T cells were defined as CD3<sup>+</sup> (D); Single CD4<sup>+</sup> (up-left quadrant) and CD8<sup>+</sup> (low-right quadrant) T cells (E) were set according to their expression of CD4 and CD8, respectively. Values inside the dot plot correspond to the percentage of cells in each quadrant. Gates were defined based on FMO control stainings.
